# Supplementary material for: Recommendations for diagnosing STIC: a systematic review and meta-analysis
Source: PubMed Central journal article supplement (PMC9023413; doi:10.1007/s00428-021-03244-w), 2021-12-01
Supplement: 428_2021_3244_MOESM1_ESM.pdf [file 428_2021_3244_MOESM1_ESM.pdf]

# SUPPLEMENTARY APPENDIX

## Recommendations for diagnosing STIC. A review and meta-analysis.

Virchows Archiv

Authors: J.M.A. Bogaerts, M. P. Steenbeek, M.H.D. van Bommel, J. Bulten, J.A.W.M. van der Laak, J.A. de Hullu, M. Simons.

Corresponding author: J.M.A. Bogaerts, department of Pathology, Radboud University Medical Center, Nijmegen, The Netherlands. E-Mail: [joep.bogaerts@radboudumc.nl](mailto:joep.bogaerts@radboudumc.nl)

### List of online supplementary Information:

- Supplement figure 1: PRISMA flow diagram on the selection of studies.
- Supplement figure 2: assessment for the risk of bias, using the checklist for observational Cohort and Cross-sectional studies of the National Heart, Lung and Blood institute (NIH).
- Supplement figure 3: forest plot representing the proportion of STIC, with subgroup analysis based on whether all specimens were examined according to the SEE-FIM protocol.
- Supplement figure 4: forest plot representing the proportion of STIC, with subgroup analysis based on whether studies mention a dedicated gynecopathologist.
- Supplement figure 5: forest plot representing the proportion of STIC, with subgroup analysis based on the reported use of IHC.
- Supplement figure 6: table describing the use of immunohistochemical stains.
- Search protocol.

# SUPPLEMENTARY APPENDIX

Supplement figure 1: PRISMA flow diagram on the selection of studies.

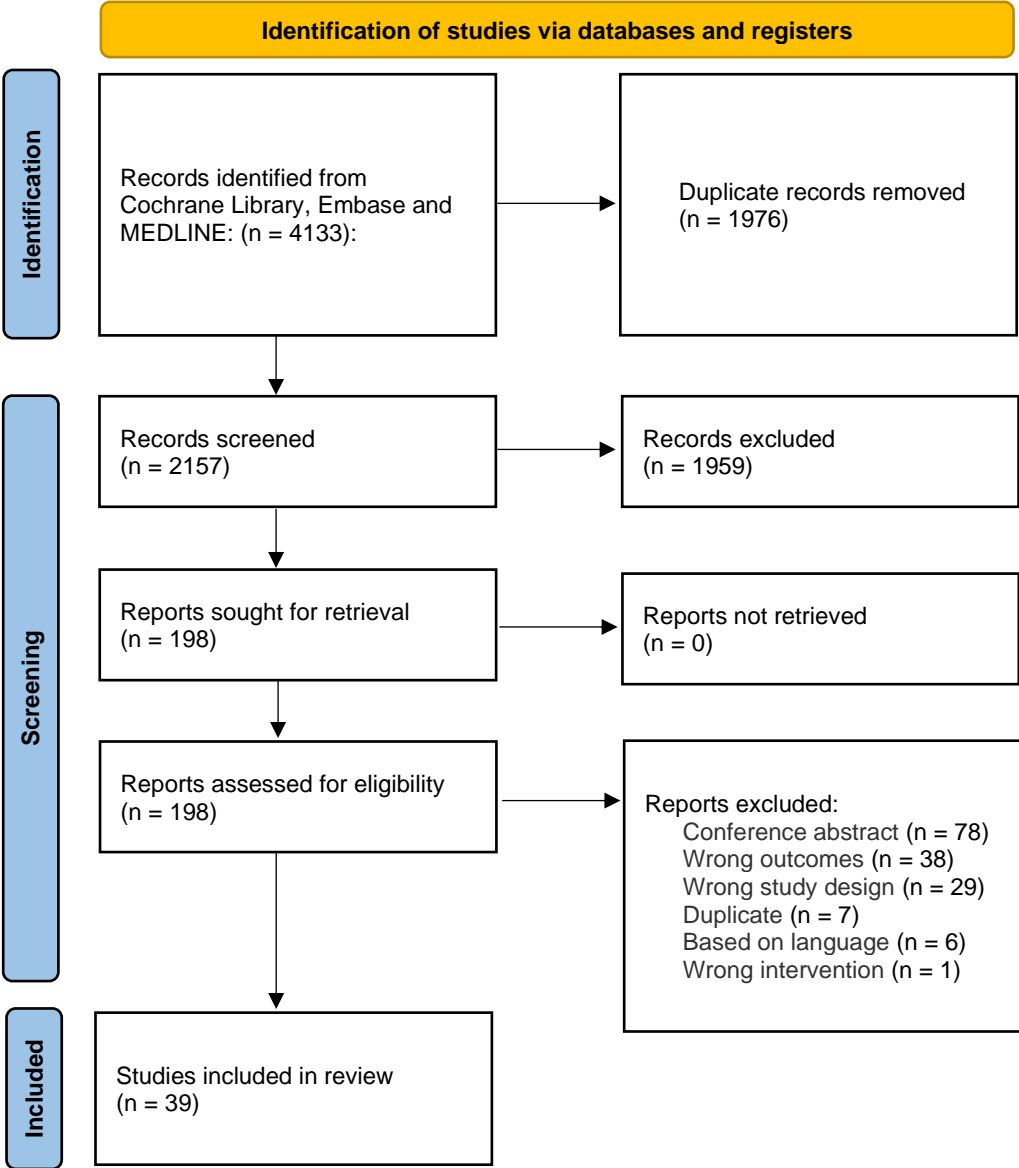

Supplement figure 2: assessment for the risk of bias, using the checklist for observational Cohort and Cross-sectional studies of the National Heart, Lung and Blood institute (NIH)

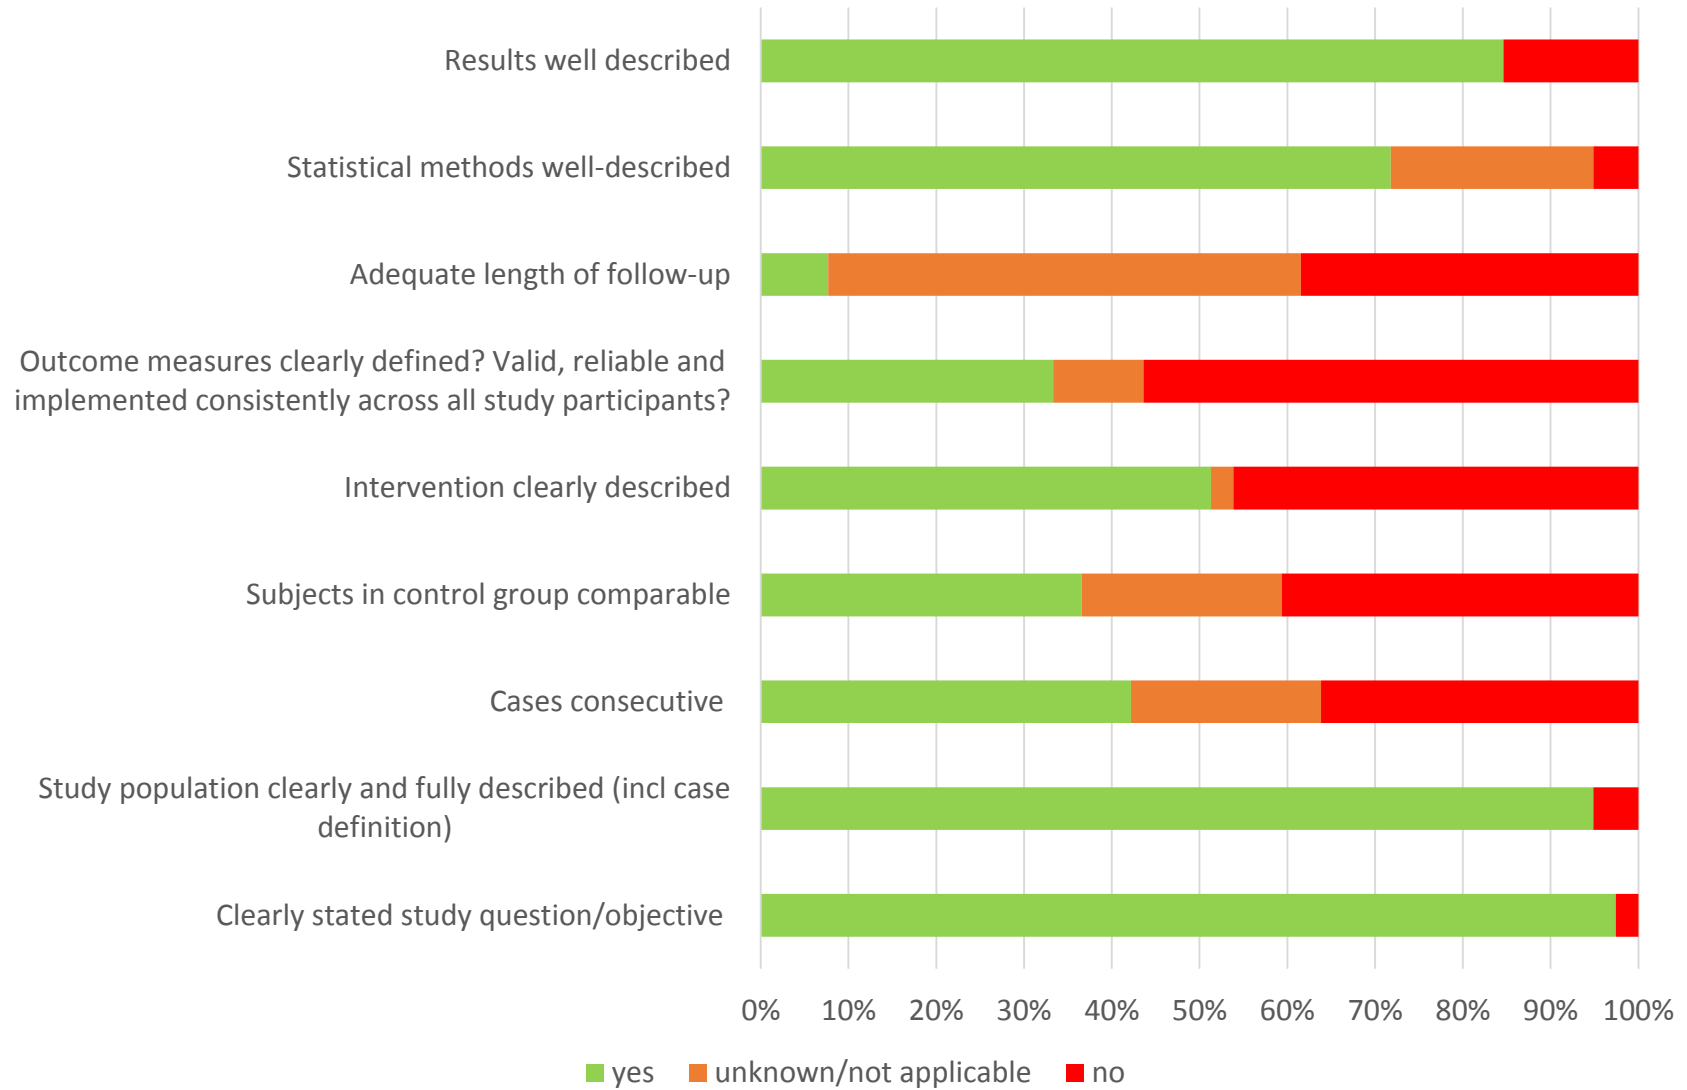

Supplement figure 3: Forest plot representing the proportion of STIC, with subgroup analysis based on whether all specimens were examined according to the SEE-FIM protocol.

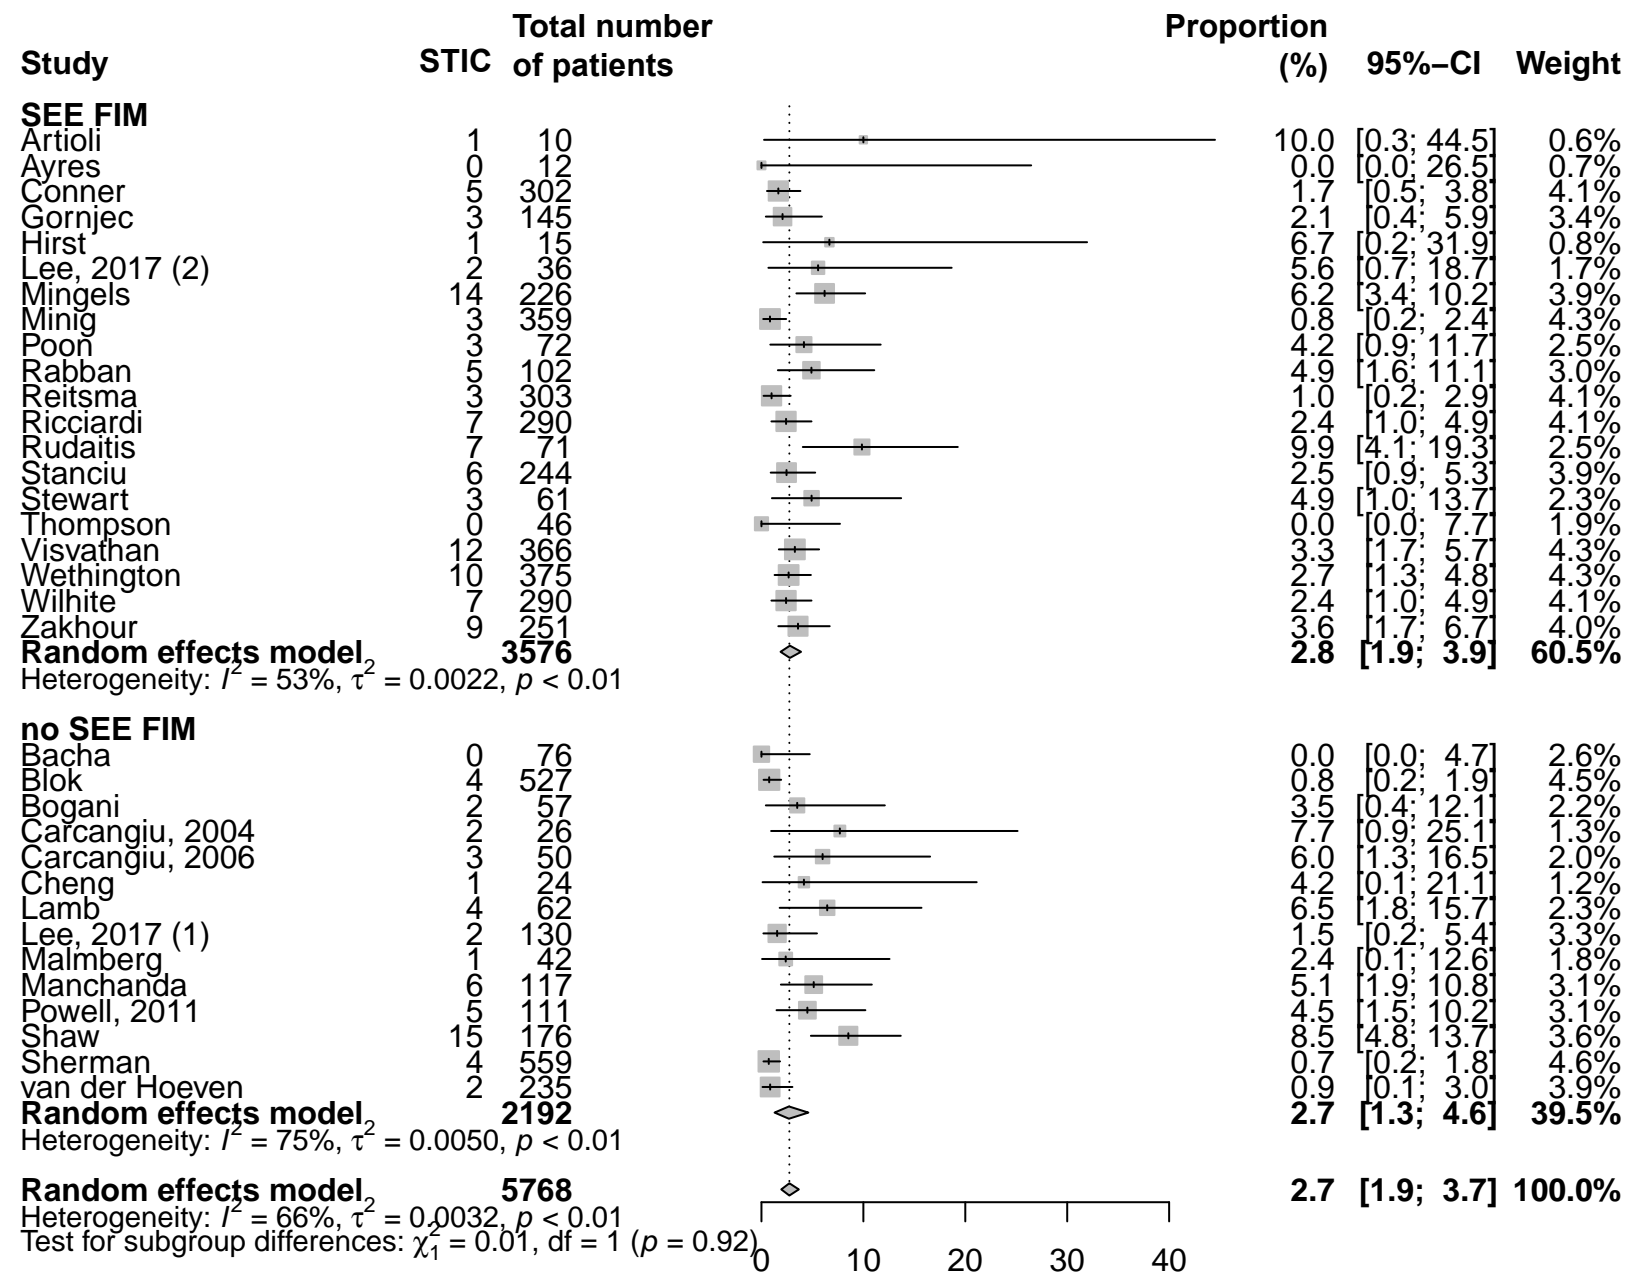

Supplement figure 4: Forest plot representing the proportion of STIC, with subgroup analysis based on whether studies mention a dedicated gynecopathologist.

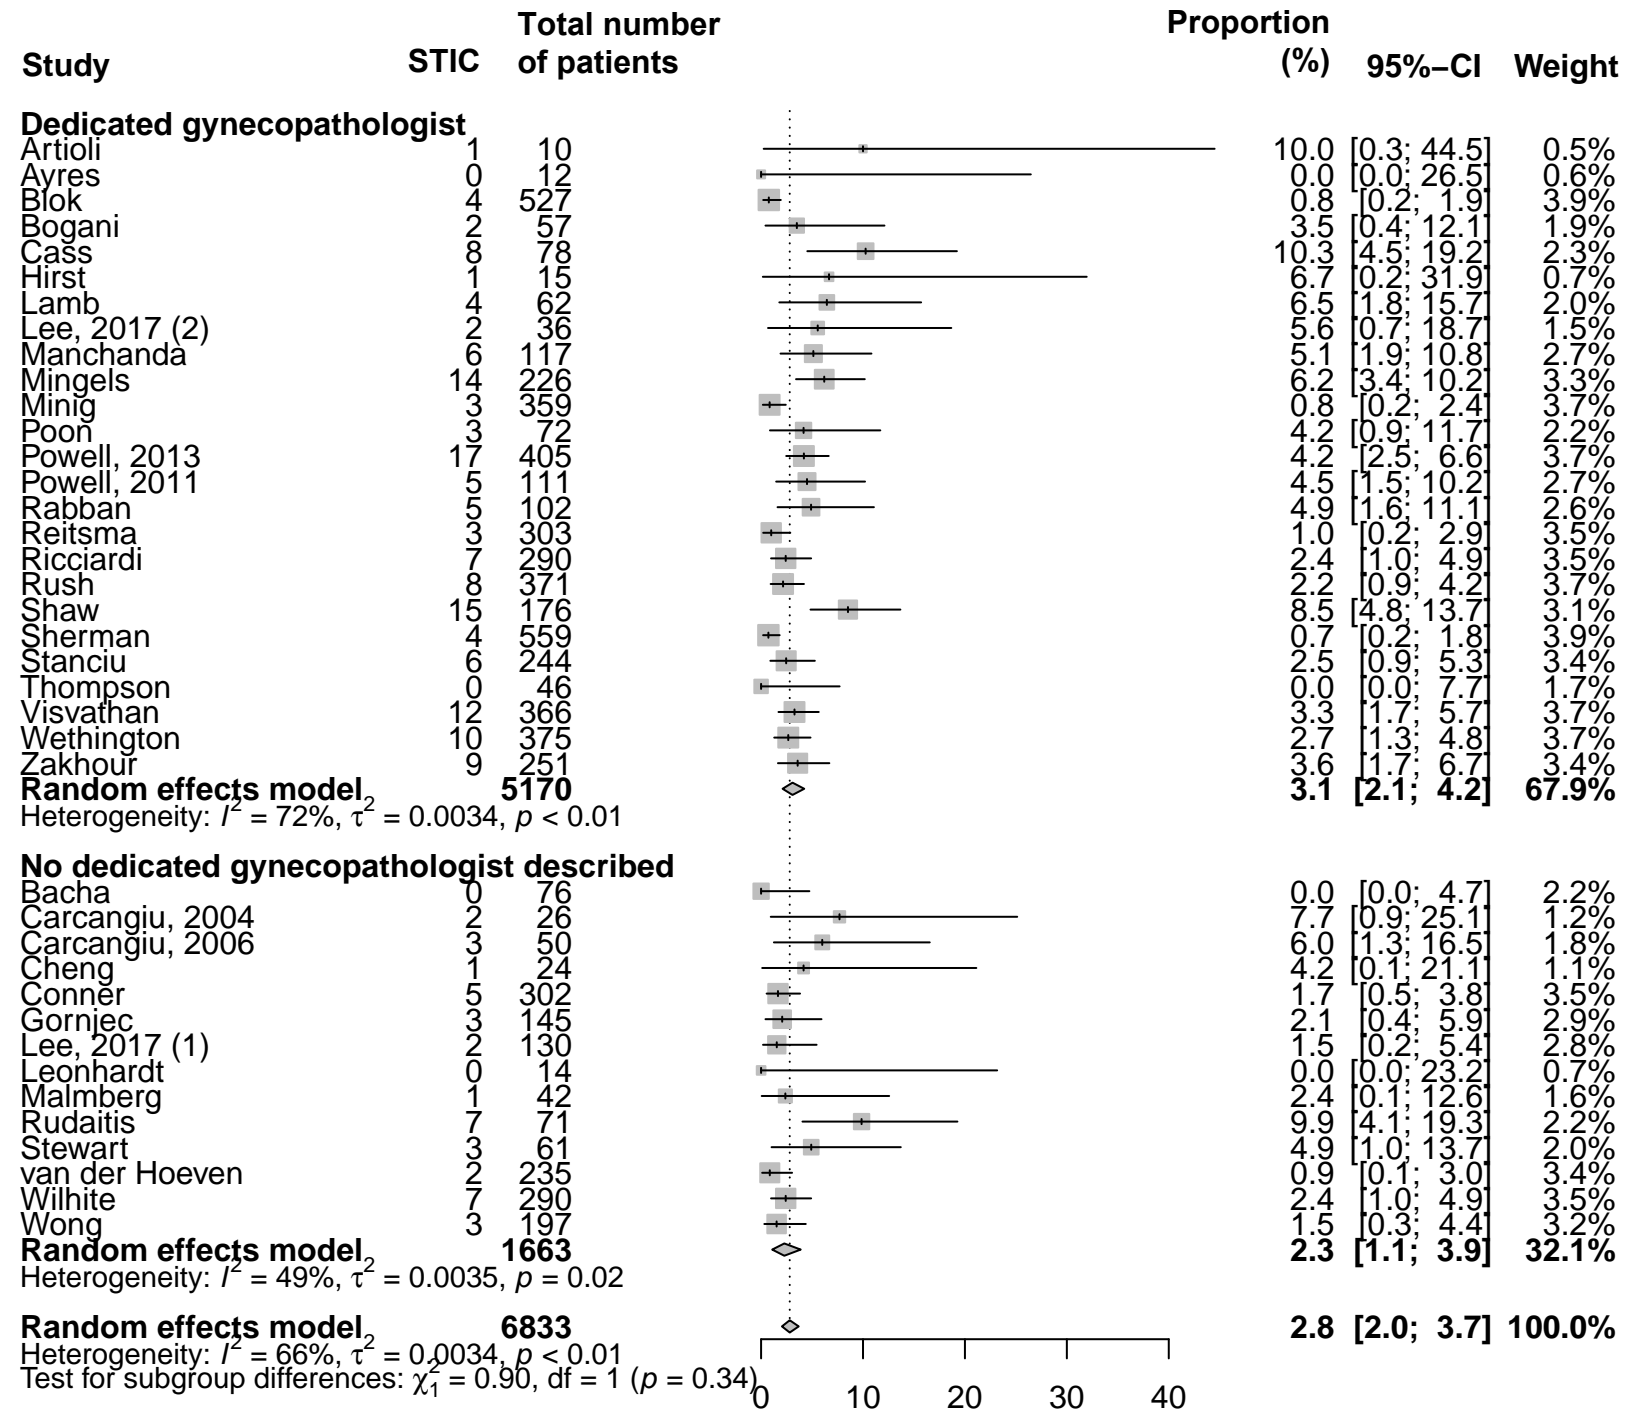

Supplement figure 5: Forest plot representing the proportion of STIC, with subgroup analysis based on the reported use of IHC.

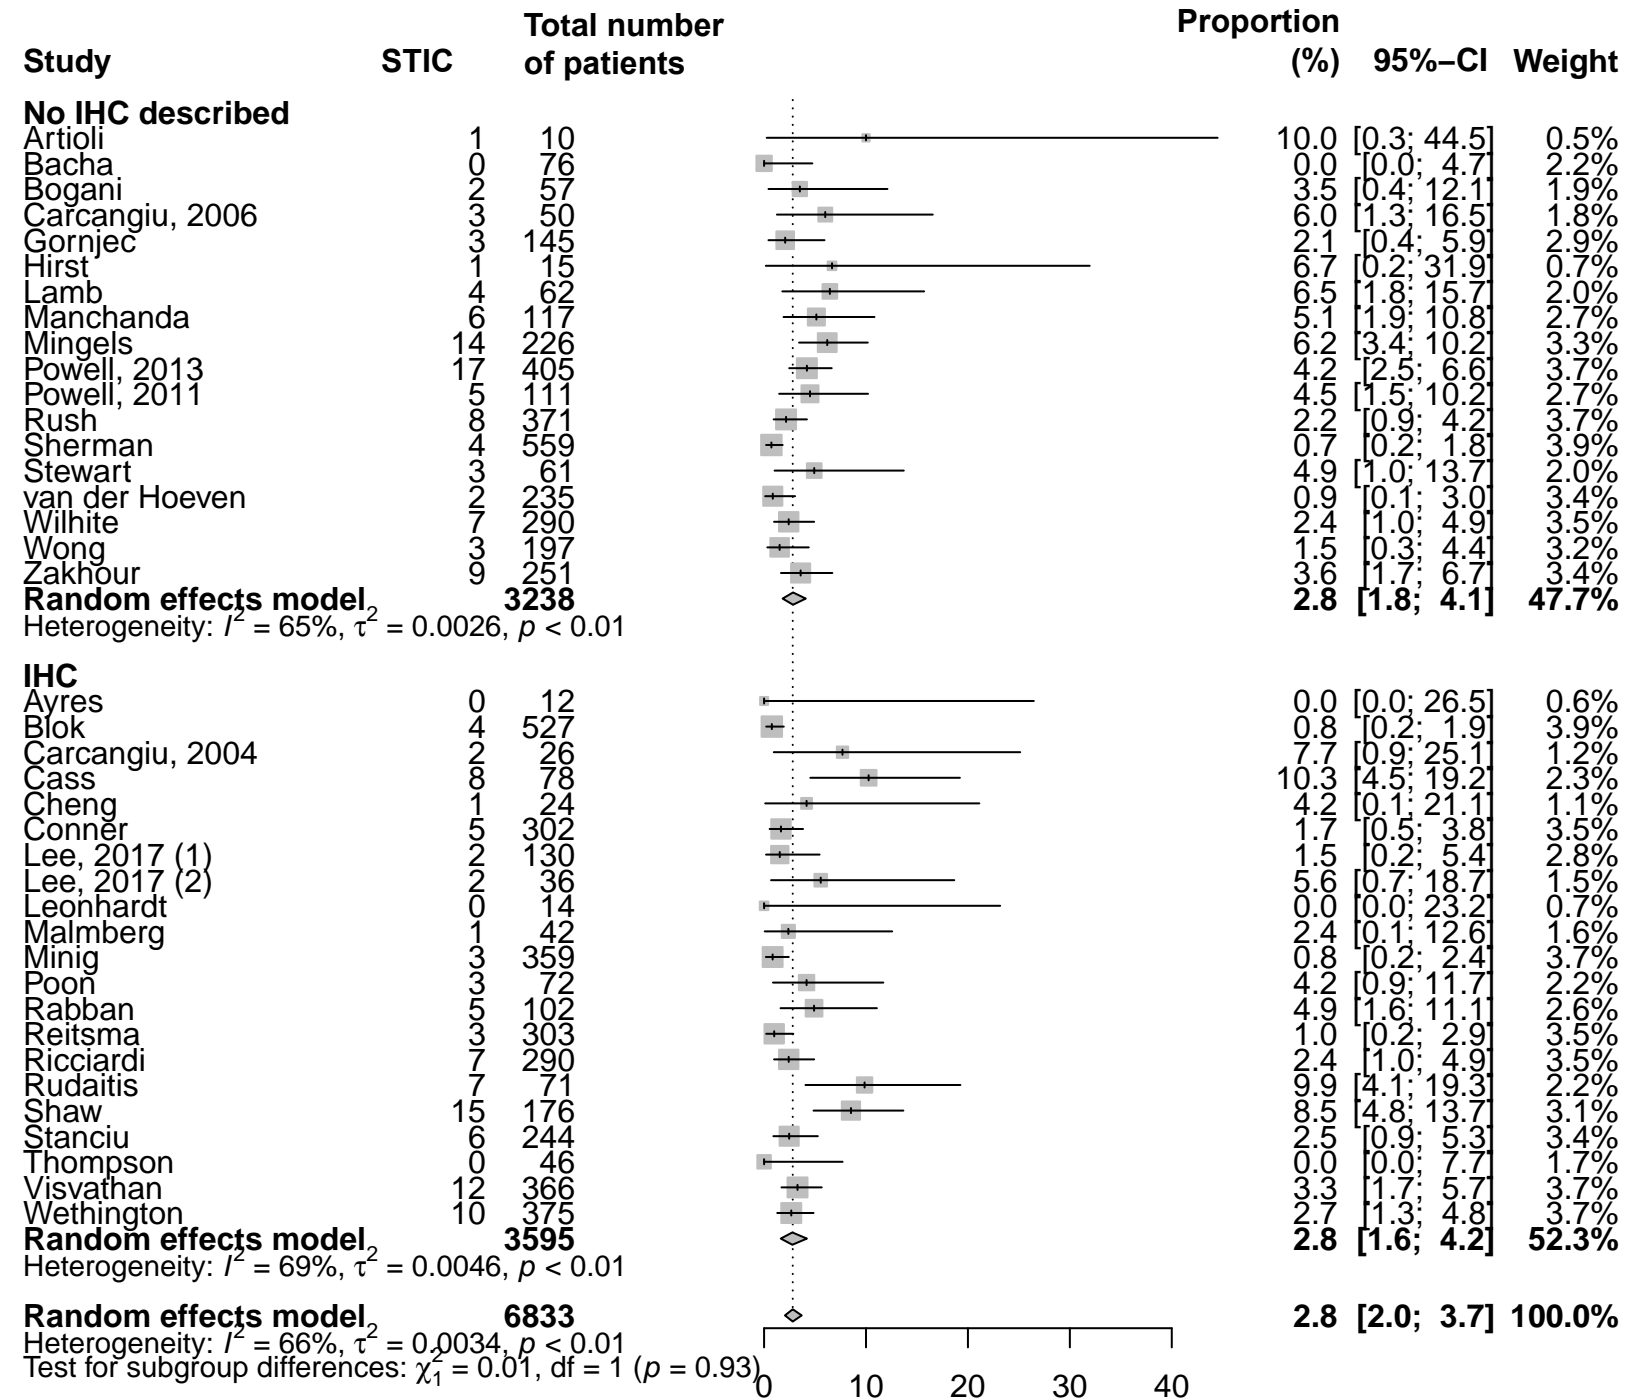

Supplement figure 6: table describing the use of immunohistochemical stains.

| Author      | Year | Aim of the study                                                                                                                                             | P53         | Ki67       | Description of use of IHC                                                                                                                                                                                                                                                                                                                                                                                                                                                                       |
|-------------|------|--------------------------------------------------------------------------------------------------------------------------------------------------------------|-------------|------------|-------------------------------------------------------------------------------------------------------------------------------------------------------------------------------------------------------------------------------------------------------------------------------------------------------------------------------------------------------------------------------------------------------------------------------------------------------------------------------------------------|
| Shaw        | 2009 | Validate previous findings in a larger series from BRCA1/2 mutation carriers, and further characterize precursors by histological assessment and IHC.        | uncertain * | necessary  | All fallopian tube sections were stained for p53 and Ki67. p53 was considered positive if greater than 75% of nuclei stained positive in a region exceeding 12 cells. Ki67 was considered increased if there was nuclear staining in a discrete focus greater than twice that of adjacent epithelium.<br><br>* Only describes P53 overexpression pattern. Null pattern or cytoplasmic pattern are not mentioned. The value of P53 in this setting is difficult to compare to current knowledge. |
| Leonhardt   | 2011 | Evaluate the role of the fimbriated end of fallopian tubes with regard to p53 signature, TILT, and STIC in cases of different kinds of serous pelvic cancer. | necessary   | necessary  | p53 signature: p53 accumulation in 12 or more consecutive secretory cell nuclei, with very low proliferative index and no cytologic atypia; TILT: intermediate lesions between p53 signature and STIC, with a low/moderate proliferative index, no cytologic atypia, but p53 accumulation; STIC: composed of secretory cells showing a high proliferative index, significant atypia, architectural alterations, and strong staining for p53.                                                    |
| Wethington  | 2013 | Identify isolated STIC and assess the clinical outcomes of these cases.                                                                                      | supportive  | supportive | IHC was performed only when nuclear atypia was present. IHC stains included p53 and Mib-1. Elevated Mib-1 (>15% nuclear cell staining) and abnormal p53 staining (null phenotype or >60% nuclear cell staining) were used as supportive evidence of the diagnosis.                                                                                                                                                                                                                              |
| Conner      | 2014 | Compute the risk of clinically silent adnexal neoplasia in women with germline BRCA1/2 mutations.                                                            | supportive  | supportive | Histologic criteria of HG/TIN consist of a combination of marked nuclear atypia and some loss of cell polarity, typically accompanied by an increased proliferative index and either strong or absent immuno-positivity for p53.                                                                                                                                                                                                                                                                |
| Lee         | 2017 | Determine the quality of RRSO surgery and pathology                                                                                                          | necessary   | necessary  | Based on morphology, and immunostaining for p53 and Ki67 as recommended by Visvanathan et al.                                                                                                                                                                                                                                                                                                                                                                                                   |
| Minig       | 2018 | Determine the incidence of STIC in BRCA mutation carriers after RRSO, as well as to describe oncological outcomes after RRSO.                                | supportive  | supportive | Elevated Mib-1 (>15%) and abnormal p53 staining (null phenotype or > 60%) were used as supportive evidence of the diagnosis. Following the recommendation of the College of American Pathologists, IHC stains was not necessary in the presence of STIC, but if there was diagnostic uncertainty, both p53 and MIB-1 staining were performed                                                                                                                                                    |
| Thompson    | 2018 | Analysis of indications and outcomes of RRSO                                                                                                                 | necessary   | necessary  | STIC is diagnosed based on a combination of atypical morphology, aberrant immunohistochemical expression of P53 (mutation type pattern of either strong diffuse expression or absent staining) and an increased proliferation rate.                                                                                                                                                                                                                                                             |
| Visvanathan | 2018 | Determine the prevalence of STIC and STIL and identify novel epidemiologic and clinical risk/protective factors associated with these precursor lesions.     | necessary   | necessary  | p53 was scored as aberrant if diffuse expression (>75% of the cell) was present in at least 12 epithelial cells or there was complete absence of staining or nonabnormal pattern, and Ki-67 was categorized as <10% or >10% staining. STICs are expected to be laminin g1 positive, p53 diffuse, or completely negative and Ki-67 > 10%.                                                                                                                                                        |
| Blok        | 2019 | Determine the prevalence of high grade serous carcinoma and STIC in BRCA1/2 carriers presenting for RRSO, and their follow-up.                               | supportive  | supportive | IHC with p53 and MIB-1 was conducted for the cases with a HGSC and/or STIC. Diffuse intense staining with p53 was noted as 'mutation pattern', and complete absence of staining was noted as 'null-pattern'. Mutation or null-pattern p53 staining with a MIB-1 labeling index $\geq 10\%$ were considered confirmatory for the diagnosis of STIC                                                                                                                                               |
| Cheng       | 2020 | To evaluate the benefit of RRSO by estimating the pathological positive rate of occult lesions, including STIC and occult cancers.                           | supportive  | supportive | The diagnosis of STIC is based on a combination of morphological features. In addition, IHC features supporting the diagnosis of STIC include p53 status (overexpression >60% or no expression) and increased proliferative activity as reflected by the Ki-67 index.                                                                                                                                                                                                                           |

## Search protocol:

### EMBASE search

| <input type="checkbox"/> | #<br>▲ Searches                                                                                                  | Results | Type     |
|--------------------------|------------------------------------------------------------------------------------------------------------------|---------|----------|
| <input type="checkbox"/> | 1 BRCA1 protein/                                                                                                 | 14846   | Advanced |
| <input type="checkbox"/> | 2 BRCA2 protein/                                                                                                 | 10767   | Advanced |
| <input type="checkbox"/> | 3 exp "hereditary breast and ovarian cancer syndrome"/                                                           | 442     | Advanced |
| <input type="checkbox"/> | 4 BRCA*.ti,ab,kw.                                                                                                | 26044   | Advanced |
| <input type="checkbox"/> | 5 ((Hereditary or familial or high risk) adj3 ovar* adj3 (cancer* or carcinoma* or neoplas*)).ti,ab,kw.          | 3154    | Advanced |
| <input type="checkbox"/> | 6 1 or 2 or 3 or 4 or 5                                                                                          | 32062   | Advanced |
| <input type="checkbox"/> | 7 exp Salpingectomy/                                                                                             | 3937    | Advanced |
| <input type="checkbox"/> | 8 salpingectom*.ti,ab,kw.                                                                                        | 2824    | Advanced |
| <input type="checkbox"/> | 9 Fallopian Tubes/                                                                                               | 1195    | Advanced |
| <input type="checkbox"/> | 10 exp ovariectomy/                                                                                              | 34664   | Advanced |
| <input type="checkbox"/> | 11 (RRBSO or BSO or oophorectom* or RRSO or ovariectom* or ((risk reduc* or prophylactic) adj2 ovar*)).ti,ab,kw. | 47251   | Advanced |
| <input type="checkbox"/> | 12 7 or 8 or 9 or 10 or 11                                                                                       | 61239   | Advanced |
| <input type="checkbox"/> | 13 6 and 12                                                                                                      | 2020    | Advanced |
| <input type="checkbox"/> | 14 uterine tube tumor/                                                                                           | 1334    | Advanced |
| <input type="checkbox"/> | 15 epithelium hyperplasia/                                                                                       | 2353    | Advanced |
| <input type="checkbox"/> | 16 Pathology/                                                                                                    | 796006  | Advanced |
| <input type="checkbox"/> | 17 histology/                                                                                                    | 627732  | Advanced |
| <input type="checkbox"/> | 18 STIC.ti,ab,kw.                                                                                                | 779     | Advanced |



|                          |    |                                                                |         |          |
|--------------------------|----|----------------------------------------------------------------|---------|----------|
| <input type="checkbox"/> | 19 | Tubal intraepithelial carcinoma*.ti,ab,kw.                     | 371     | Advanced |
| <input type="checkbox"/> | 20 | (ovar* and (cancer or carcinoma)).ti,ab,kw.                    | 111520  | Advanced |
| <input type="checkbox"/> | 21 | patholog*.ti,ab,kw.                                            | 1008566 | Advanced |
| <input type="checkbox"/> | 22 | fallopian tube*.ti,ab,kw.                                      | 12604   | Advanced |
| <input type="checkbox"/> | 23 | hyperplasia.ti,ab,kw.                                          | 113244  | Advanced |
| <input type="checkbox"/> | 24 | atypia.ti,ab,kw.                                               | 15131   | Advanced |
| <input type="checkbox"/> | 25 | 14 or 15 or 16 or 17 or 18 or 19 or 20 or 21 or 22 or 23 or 24 | 2355446 | Advanced |
| <input type="checkbox"/> | 26 | 13 and 25                                                      | 1550    | Advanced |

#### MEDLINE search

| <input type="checkbox"/> | #  | Searches                                                                                                       | Results | Type     |
|--------------------------|----|----------------------------------------------------------------------------------------------------------------|---------|----------|
| <input type="checkbox"/> | 1  | genes, BRCA1/                                                                                                  | 5588    | Advanced |
| <input type="checkbox"/> | 2  | genes, BRCA2/                                                                                                  | 3551    | Advanced |
| <input type="checkbox"/> | 3  | BRCA1 protein/                                                                                                 | 4961    | Advanced |
| <input type="checkbox"/> | 4  | BRCA2 protein/                                                                                                 | 3520    | Advanced |
| <input type="checkbox"/> | 5  | "Hereditary Breast and Ovarian Cancer Syndrome"/                                                               | 205     | Advanced |
| <input type="checkbox"/> | 6  | BRCA*.ti,ab,kf.                                                                                                | 16614   | Advanced |
| <input type="checkbox"/> | 7  | ((Hereditary or familial or high risk) adj3 ovar* adj3 (cancer* or carcinoma* or neoplas*)).ti,ab,kf.          | 2121    | Advanced |
| <input type="checkbox"/> | 8  | 1 or 2 or 3 or 4 or 5 or 6 or 7                                                                                | 18817   | Advanced |
| <input type="checkbox"/> | 9  | exp salpingectomy/ or salpingo-oophorectomy/                                                                   | 1079    | Advanced |
| <input type="checkbox"/> | 10 | salpingectom*.ti,ab,kf.                                                                                        | 1781    | Advanced |
| <input type="checkbox"/> | 11 | Fallopian Tubes/su [Surgery]                                                                                   | 3233    | Advanced |
| <input type="checkbox"/> | 12 | ((RRBSO or BSO or oophorectom* or RRSO or ovariectom* or ((risk reduc* or prophylactic) adj2 ovar*)).ti,ab,kf. | 37665   | Advanced |

|                          |                                                             |        |          |
|--------------------------|-------------------------------------------------------------|--------|----------|
| <input type="checkbox"/> | 13 exp ovariectomy/ or salpingo-oophorectomy/               | 23970  | Advanced |
| <input type="checkbox"/> | 14 fallopian tube neoplasms/                                | 2700   | Advanced |
| <input type="checkbox"/> | 15 9 or 10 or 11 or 12 or 13                                | 48104  | Advanced |
| <input type="checkbox"/> | 16 8 and 15                                                 | 1060   | Advanced |
| <input type="checkbox"/> | 17 Hyperplasia/                                             | 32070  | Advanced |
| <input type="checkbox"/> | 18 STIC.ti,ab,kf.                                           | 434    | Advanced |
| <input type="checkbox"/> | 19 Tubal intraepithelial carcinoma*.ti,ab,kf.               | 186    | Advanced |
| <input type="checkbox"/> | 20 Epithelial ovarian cancer.ti,ab,kf.                      | 8103   | Advanced |
| <input type="checkbox"/> | 21 (ovar* and (cancer or carcinoma)).ti,ab,kf.              | 77497  | Advanced |
| <input type="checkbox"/> | 22 patholog*.ti,ab,kf.                                      | 736770 | Advanced |
| <input type="checkbox"/> | 23 fallopian tube*.ti,ab,kf.                                | 10432  | Advanced |
| <input type="checkbox"/> | 24 hyperplasia.ti,ab,kf.                                    | 84257  | Advanced |
| <input type="checkbox"/> | 25 atypia.ti,ab,kf.                                         | 10070  | Advanced |
| <input type="checkbox"/> | 26 14 or 17 or 18 or 19 or 20 or 21 or 22 or 23 or 24 or 25 | 907384 | Advanced |
| <input type="checkbox"/> | 27 16 and 26                                                | 823    | Advanced |

### Cochrane search

Search Name: RRSO review\_Cochrane search

| ID | Search Hits                                                                                            |
|----|--------------------------------------------------------------------------------------------------------|
| #1 | MeSH descriptor: [Genes, BRCA2] this term only 52                                                      |
| #2 | MeSH descriptor: [Genes, BRCA1] this term only 66                                                      |
| #3 | MeSH descriptor: [BRCA1 Protein] this term only 53                                                     |
| #4 | MeSH descriptor: [BRCA2 Protein] this term only 40                                                     |
| #5 | MeSH descriptor: [Hereditary Breast and Ovarian Cancer Syndrome] this term only 9                      |
| #6 | (BRCA*):ti,ab,kw 777                                                                                   |
| #7 | ((Hereditary or familial or high risk) AND ovar* AND (cancer* or carcinoma* or neoplas*)):ti,ab,kw 501 |

**#8 #1 or #2 or #3 or #4 or #5 or #6 or #7 1179**  
**#9 MeSH descriptor: [Salpingectomy] this term only 34**  
**#10 MeSH descriptor: [Ovariectomy] this term only 272**  
**#11 MeSH descriptor: [Salpingo-oophorectomy] this term only 0**  
**#12 (salpingectom\*):ti,ab,kw 186**  
**#13 MeSH descriptor: [Fallopian Tubes] this term only 166**  
**#14 ((RRBSO or BSO or oophorectom\* or RRSO or ovariectom\* or ((risk reduc\* or prophylactic) adj2 ovar\*)):ti,ab,kw 890**  
**#15 #9 or #10 or #11 or #12 or #13 or #14 1185**  
**#16 #8 and #15 59**  
**#17 MeSH descriptor: [Hyperplasia] this term only 500**  
**#18 STIC:ti,ab,kw 22**  
**#19 (Tubal intraepithelial carcinoma\*):ti,ab,kw 1**  
**#20 (ovar\* and (cancer or carcinoma)):ti,ab,kw 5579**  
**#21 (patholog\*):ti,ab,kw 59326**  
**#22 (fallopian tube\*):ti,ab,kw 884**  
**#23 (hyperplasia):ti,ab,kw. 4537**  
**#24 (atypia):ti,ab,kw 237**  
**#25 #17 or #18 or #19 or #20 or #21 or #22 or #23 or #24 68161**  
**#26 #16 and #25 55**
